# Supplementary material
Source: Springer Nature journal article supplement (https://www.springermedizin.de/resource/supplementary/12916_2010_307_MOESM4_ESM.pdf/9599600)

**Number of  
Joints at Each  
Grade**

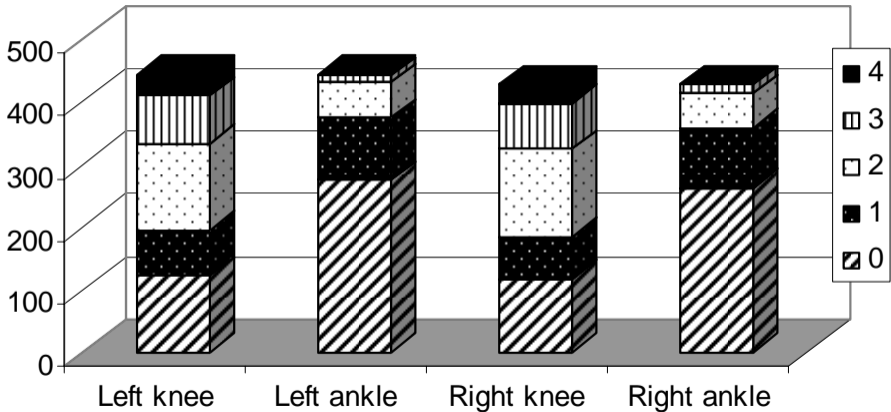

Supplement: MOESM4 [file 9599600]
